# Supplementary material
Source: PubMed Central journal article supplement (PMC8616709)
Supplement: mmc1.pdf [file mmc1.pdf]

## SUPPLEMENTARY MATERIALS

### METHODS

#### Used Serologic Assays

##### *Abbott SARS-CoV-2 IgG II Quant-test (Abbott S IgG)*

- Chemiluminescence microparticle immunoassay (CMIA).
- Quantifies IgG-type antibodies against the RBD of the viral S-protein
- Threshold for positivity:  $\geq 50$  AU/mL
- Maximum value:  $> 80.000$  AU/mL

##### *Roche Elecsys anti-SARS-CoV-2 S (Roche S tAb)*

- Electrochemiluminescence sandwich immunoassay (ECLIA)
- Quantifies total antibodies directed against the receptor-binding domain (RBD) of the viral spike (S) protein
- Threshold for positivity:  $\geq 0.8$  U/ml
- Maximum value:  $> 250$  U/mL

##### *DiaSorin Liaison SARS-CoV-2 TrimericS IgG (DiaSorin TriS IgG)*

- Chemiluminescence immunoassay (CLIA)
- Quantifies IgG antibodies against a trimeric S-protein antigen
- Threshold for positivity:  $\geq 13$  AU/ml
- Maximum value:  $> 800$  AU/ml

##### *Siemens SARS-CoV-2 IgG (Siemens sCOVG)*

- Electrochemiluminescence sandwich immunoassay (ECLIA)
- Quantifies IgG antibodies directed against the receptor-binding domain (RBD) of the viral spike (S1) protein
- Threshold for positivity:  $\geq 1.0$  U/ml

- Maximum value: > 150 AU/ml

***Wantai SARS-CoV-2 IgG ELISA (Wantai S IgG)***

- Enzyme-Linked ImmunoSorbent Assay (ELISA)
- Quantifies IgG antibodies directed against the receptor-binding domain (RBD) of the viral spike (S1) protein
- Threshold for positivity:  $\geq 0.75$  AU/ml
- Maximum value: 14.500 AU/ml

All antibody levels were expressed in binding antibody units per milliliter (BAU/mL) which are traceable to the WHO international standard for anti-SARS-CoV-2 immunoglobulin, by multiplying antibodies titers by the conversion factors suggested by the manufacturers:

- Roche S tAb (U/ml): 1.0
- Abbott S IgG (AU/ml): 0.143
- DiaSorin TriS (AU/mL): 2.6
- Siemens sCOVG (U/mL): 21.8
- Wantai S IgG (AU/mL): 1.0

Detectable antibody responses were classified as “Weak” or “Good” with a threshold of 250 BAU/mL which has been associated to an estimate close to 90% of mRNA-1273 vaccine-induced protection against symptomatic COVID-19 in immunocompetent patients for anti-Spike antibodies in the COVE trial and close to 80% of ChAdOx1 nCoV-19 efficacy in the AZD1222 trial.

**Table S1 – Interpretation of serological assays**

|                      | <b>WHO international standard</b> | <b>Abbott S IgG</b> | <b>Roche S tAb</b> | <b>DiaSorin TriS</b> | <b>Siemens sCOVG</b> | <b>Wantai S IgG</b> |
|----------------------|-----------------------------------|---------------------|--------------------|----------------------|----------------------|---------------------|
| <b>Unit</b>          | BAU/mL                            | AU/mL               | U/mL               | AU/mL                | U/mL                 | AU/mL               |
| <b>Positivity</b>    | -                                 | ≥ 50                | ≥ 0.8              | ≥ 13                 | ≥ 1.0                | ≥ 0.75              |
| <b>Weak response</b> | < 250                             | < 1748              | < 250              | < 96                 | < 11.5               | < 250               |
| <b>Good response</b> | ≥ 250                             | ≥ 1748              | ≥ 250              | ≥ 96                 | ≥ 11.5               | ≥ 250               |

**Table S2 - Used serologic assay and vaccine types**

|                        | <b>Overall</b> |
|------------------------|----------------|
|                        | n = 687        |
| <b>Serologic assay</b> |                |
| Abbott S IgG           | 373 (54.3)     |
| Roche S tAb            | 185 (26.9)     |
| DiaSorin TriS IgG      | 42 (6.1)       |
| Siemens sCOVG          | 55 (8.0)       |
| Wantai S IgG           | 32 (4.7)       |
| <b>mRNA vaccines</b>   |                |
| BNT162b2               | 657 (95.6)     |
| mRNA-1273              | 30 (4.4)       |

All results are n (%).

### **Statistics**

Proportions were assessed with an exact binomial confidence interval; Chi-square, Mann-Whitney test, MacNemar test and Mann-Whitney U test were used as appropriate. Significant variables in univariate analysis were used to build a logistic regression model to assess factors independently associated with the absence of antibody response after two vaccine doses. All tests were 2-sided with  $\alpha = .05$ . Analyses were performed using R Statistical Software (version 4.0.3).

## RESULTS

### Serologic response after 2 doses of vaccine

**Table S3 – Univariate analysis of factors associated with the absence of serologic response after 2 doses of mRNA vaccine against SARS-CoV-2**

|                                                               | Overall    | No detectable serologic response | Detectable serologic response | Serologic response rate | p-value* |
|---------------------------------------------------------------|------------|----------------------------------|-------------------------------|-------------------------|----------|
|                                                               | n = 687    | n = 149                          | n = 538                       |                         |          |
| <b>Age</b>                                                    |            |                                  |                               |                         | 0.690    |
| ≥ 50 years old                                                | 463 (67.4) | 111 (74.5)                       | 352 (65.4)                    | 76%                     |          |
| < 50 years old                                                | 224 (32.6) | 38 (25.5)                        | 186 (34.6)                    | 83%                     |          |
| <b>Sex †</b>                                                  |            |                                  |                               |                         | 1.0      |
| Male                                                          | 399 (59.0) | 91 (63.6)                        | 308 (57.8)                    | 77%                     |          |
| Female                                                        | 277 (41.0) | 52 (36.4)                        | 225 (42.2)                    | 81%                     |          |
| <b>Disease Type †</b>                                         |            |                                  |                               |                         | 0.765    |
| Myeloid malignancy                                            | 439 (69.0) | 97 (77.0)                        | 342 (67.1)                    | 78%                     |          |
| Lymphoid malignancy                                           | 168 (26.4) | 27 (21.4)                        | 141 (27.6)                    | 84%                     |          |
| Nonmalignant                                                  | 29 (4.6)   | 2 (1.6)                          | 27 (5.3)                      | 93%                     |          |
| <b>Conditioning †</b>                                         |            |                                  |                               |                         | 0.726    |
| RIC                                                           | 430 (68.7) | 99 (76.2)                        | 331 (66.7)                    | 77%                     |          |
| MAC                                                           | 196 (31.3) | 31 (23.8)                        | 165 (33.3)                    | 84%                     |          |
| <b>Donor Type †</b>                                           |            |                                  |                               |                         | 0.180    |
| Matched unrelated                                             | 333 (50.8) | 71 (54.2)                        | 262 (49.9)                    | 79%                     |          |
| HLA-identical sibling                                         | 194 (29.6) | 26 (19.8)                        | 168 (32.0)                    | 87%                     |          |
| Haplo-identical                                               | 129 (19.7) | 34 (26.0)                        | 95 (18.1)                     | 74%                     |          |
| <b>Pretransplant CMV Serostatus †</b>                         |            |                                  |                               |                         | 0.945    |
| Recipient seronegative                                        | 282 (48.0) | 44 (39.6)                        | 238 (50.0)                    | 84%                     |          |
| Recipient seropositive                                        | 305 (52.0) | 67 (60.4)                        | 238 (50.0)                    | 78%                     |          |
| <b>History of GVHD requiring systemic treatment †</b>         | 239 (38.4) | 51 (39.8)                        | 188 (38.0)                    | 78%                     | 1.0      |
| <b>Time since transplantation</b>                             |            |                                  |                               |                         | < 0.001  |
| < 12 months                                                   | 144 (21.0) | 77 (51.7)                        | 67 (12.5)                     | 47%                     |          |
| ≥ 12 months                                                   | 543 (79.0) | 72 (48.3)                        | 471 (87.5)                    | 87%                     |          |
| <b>Disease relapse after HSCT †</b>                           | 61 (10.7)  | 17 (15.3)                        | 44 (9.6)                      | 72%                     | 1.0      |
| <b>Ongoing antineoplastic treatments</b>                      | 74 (11.2)  | 26 (19.5)                        | 48 (9.1)                      | 65%                     | 0.015    |
| <b>Ongoing immunosuppressive treatments (&lt; 3 months) †</b> | 203 (30.0) | 89 (60.5)                        | 114 (21.6)                    | 56%                     | < 0.001  |
| <b>Rituximab (&lt; 6 months) †</b>                            | 29 (4.4)   | 24 (16.3)                        | 5 (1.0)                       | 17%                     | < 0.001  |
| <b>Absolute lymphocyte count (G/L) †</b>                      |            |                                  |                               |                         | < 0.001  |
| ≥ 1G/L                                                        | 421 (70.2) | 51 (37.5)                        | 370 (79.7)                    | 88%                     |          |
| < 1G/L                                                        | 179 (29.8) | 85 (62.5)                        | 94 (20.3)                     | 52%                     |          |
| <b>T-CD4+ cell count †</b>                                    |            |                                  |                               |                         | 0.001    |
| ≥ 500/mm <sup>3</sup>                                         | 174 (35.4) | 14 (13.2)                        | 160 (41.6)                    | 92%                     |          |
| < 500/mm <sup>3</sup>                                         | 317 (64.6) | 92 (86.8)                        | 225 (58.4)                    | 71%                     |          |
| <b>B-CD19+ cell count †</b>                                   |            |                                  |                               |                         | < 0.001  |
| ≥ 100/mm <sup>3</sup>                                         | 274 (72.7) | 24 (28.6)                        | 250 (85.3)                    | 91%                     |          |
| < 100/mm <sup>3</sup>                                         | 103 (27.3) | 60 (71.4)                        | 43 (14.7)                     | 41%                     |          |

|                            |            |           |            |     |         |
|----------------------------|------------|-----------|------------|-----|---------|
| <b>Gammaglobulinemia †</b> |            |           |            |     | < 0.001 |
| ≥ 6 g/L                    | 395 (71.3) | 62 (50.4) | 333 (77.3) | 84% |         |
| < 6 g/L                    | 159 (28.7) | 61 (49.6) | 98 (22.7)  | 62% |         |

All results are n (%). \*after Bonferroni Correction for multiple (16) tests. † Missing data: 11 for sex, 51 for disease type, 61 for conditioning, 31 for donor type, 100 for CMV serostatus, 64 for history of GVHD, 117 for disease relapse, 29 for anti-neoplastic treatment, 11 for immunosuppressive treatments, 35 for Rituximab, 87 for lymphocytes count, 196 for T-CD4+ cell count, 310 for B-CD19+ cell count and 133 for gammaglobulinemia. Vaccine efficacy rate is the proportion of patients with a detectable antibody response. RIC for reduced intensity conditioning, MAC for myeloablative conditioning, HSCT for hematopoietic stem cell transplantation, GVHD for graft versus host disease, CMV for cytomegalovirus.

**Table S4 – Multivariate analysis of factors associated with the absence of antibody response after 2 doses of mRNA vaccine against SARS-CoV-2**

|                                                     | Multivariate model 1<br>n = 578 |          | Multivariate model 2<br>n = 352 |          |
|-----------------------------------------------------|---------------------------------|----------|---------------------------------|----------|
|                                                     | Odds-ratio (95%CI)              | p-value* | Odds-ratio (95%CI)              | p-value* |
| <b>Time since transplantation &lt; 1 year</b>       | 2.73 (1.63 to 4.59)             | < 0.001  | 4.67 (2.41 to 9.07)             | < 0.001  |
| <b>Antineoplastic treatments (&lt; 3 months)</b>    | 1.74 (0.93 to 3.23)             | 0.403    | 1.47 (0.62 to 3.5)              | 1.0      |
| <b>Immunosuppressive treatments (&lt; 3 months)</b> | 3.41 (2.09 to 5.55)             | < 0.001  | 2.75 (1.37 to 5.54)             | 0.032    |
| <b>Rituximab (&lt; 6 months)</b>                    | 13.61 (4.1 to 45.19)            | < 0.001  | 3.87 (0.72 to 20.8)             | 0.809    |
| <b>Absolute lymphocyte count &lt; 1 G/L</b>         | 3.09 (1.88 to 5.09)             | < 0.001  | -                               | -        |
| <b>T-CD4+ cell count &lt; 500/mm<sup>3</sup></b>    | -                               | -        | 1.94 (0.88 to 4.29)             | 0.718    |
| <b>B-CD19+ cell count &lt; 100/mm<sup>3</sup></b>   | -                               | -        | 5.72 (2.75 to 11.87)            | < 0.001  |
| <b>Gammaglobulinemia &lt; 6 g/L</b>                 | -                               | -        | 1.09 (0.53 to 2.26)             | 1.0      |

Multivariate model 1 is adjusted in the full sample with available lymphocyte count (n=578, including 453 patients with an antibody response and 125 without), while multivariate model 2 is adjusted in a subset of patients with available gammaglobulinemia and T-CD4+ and B-CD19+ cells count (n=352, including 275 patients with a detectable antibody response and 77 without). \* After Bonferroni Correction for multiple tests (5 and 7 tests). All variables significantly associated with antibody response in univariate analysis were included in the multivariate analysis.

## Focus on patients vaccinated within the first year from HSCT

**Table S5 –Univariate analysis of factors associated with the absence of serologic response after 2 doses of mRNA vaccine against SARS-CoV-2 in patients vaccinated within the first year from HSCT**

|                                                               | Overall    | No detectable serologic response | Detectable serologic response | Serologic response rate | p-value* |
|---------------------------------------------------------------|------------|----------------------------------|-------------------------------|-------------------------|----------|
|                                                               | n = 144    | n = 77                           | n = 67                        |                         |          |
| <b>Age</b>                                                    |            |                                  |                               |                         | 0.068    |
| ≥ 50 years old                                                | 100 (69.4) | 59 (76.6)                        | 41 (61.2)                     | 41%                     |          |
| < 50 years old                                                | 44 (30.6)  | 18 (23.4)                        | 26 (38.8)                     | 59%                     |          |
| <b>Sex †</b>                                                  |            |                                  |                               |                         | 0.888    |
| Male                                                          | 89 (64.0)  | 47 (65.3)                        | 42 (62.7)                     | 47%                     |          |
| Female                                                        | 50 (36.0)  | 25 (34.7)                        | 25 (37.3)                     | 50%                     |          |
| <b>Disease Type †</b>                                         |            |                                  |                               |                         | 0.246    |
| Myeloid malignancy                                            | 93 (75.6)  | 50 (82.0)                        | 43 (69.4)                     | 46%                     |          |
| Lymphoid malignancy                                           | 28 (22.8)  | 10 (16.4)                        | 18 (29.0)                     | 64%                     |          |
| Nonmalignant                                                  | 2 (1.6)    | 1 (1.6)                          | 1 (1.6)                       | 50%                     |          |
| <b>Conditioning †</b>                                         |            |                                  |                               |                         | 0.448    |
| RIC                                                           | 90 (73.2)  | 47 (77.0)                        | 43 (69.4)                     | 48%                     |          |
| MAC                                                           | 33 (26.8)  | 14 (23.0)                        | 19 (30.6)                     | 58%                     |          |
| <b>Donor Type †</b>                                           |            |                                  |                               |                         | 0.256    |
| Matched unrelated                                             | 56 (44.8)  | 32 (51.6)                        | 24 (38.1)                     | 43%                     |          |
| HLA-identical sibling                                         | 26 (20.8)  | 10 (16.1)                        | 16 (25.4)                     | 62%                     |          |
| Haplo-identical                                               | 43 (34.4)  | 20 (32.3)                        | 23 (36.5)                     | 53%                     |          |
| <b>Pretransplant CMV Serostatus †</b>                         |            |                                  |                               |                         | 0.086    |
| Recipient seronegative                                        | 43 (45.3)  | 17 (35.4)                        | 26 (55.3)                     | 40%                     |          |
| Recipient seropositive                                        | 52 (54.7)  | 31 (64.6)                        | 21 (44.7)                     | 60%                     |          |
| <b>History of GVHD requiring systemic treatment †</b>         | 34 (28.8)  | 23 (37.7)                        | 11 (19.3)                     | 32%                     | 0.045    |
| <b>Time since transplantation</b>                             |            |                                  |                               |                         | 0.136    |
| < 6 months                                                    | 28 (19.4)  | 19 (24.7)                        | 9 (13.4)                      | 32%                     |          |
| 6-12 months                                                   | 116 (80.6) | 58 (75.3)                        | 58 (86.6)                     | 50%                     |          |
| <b>Disease relapse after HSCT †</b>                           | 12 (11.5)  | 7 (13.7)                         | 5 (9.4)                       | 42%                     | 0.706    |
| <b>Ongoing antineoplastic treatments</b>                      | 18 (14.4)  | 9 (14.3)                         | 9 (14.5)                      | 50%                     | 1.0      |
| <b>Ongoing immunosuppressive treatments (&lt; 3 months) †</b> | 83 (58.0)  | 49 (64.5)                        | 34 (50.7)                     | 41%                     | 0.136    |
| <b>Rituximab (&lt; 6 months) †</b>                            | 19 (13.3)  | 16 (21.1)                        | 3 (4.5)                       | 16%                     | 0.008    |
| <b>Absolute lymphocyte count (G/L) †</b>                      |            |                                  |                               |                         | 0.023    |
| ≥ 1G/L                                                        | 54 (39.4)  | 21 (29.6)                        | 33 (50.0)                     | 61%                     |          |
| < 1G/L                                                        | 83 (60.6)  | 50 (70.4)                        | 33 (50.0)                     | 40%                     |          |
| <b>T-CD4+ cell count †</b>                                    |            |                                  |                               |                         | 0.014    |
| ≥ 500/mm <sup>3</sup>                                         | 26 (22.8)  | 7 (12.3)                         | 19 (33.3)                     | 73%                     |          |
| < 500/mm <sup>3</sup>                                         | 88 (77.2)  | 50 (87.7)                        | 38 (66.7)                     | 43%                     |          |
| <b>B-CD19+ cell count †</b>                                   |            |                                  |                               |                         | < 0.001  |
| ≥ 100/mm <sup>3</sup>                                         | 46 (50.5)  | 13 (28.3)                        | 33 (73.3)                     | 72%                     |          |
| < 100/mm <sup>3</sup>                                         | 45 (49.5)  | 33 (71.7)                        | 12 (26.7)                     | 27%                     |          |

|                            |           |           |           |     |       |
|----------------------------|-----------|-----------|-----------|-----|-------|
| <b>Gammaglobulinemia</b> † |           |           |           |     | 0.054 |
| ≥ 6 g/L                    | 85 (64.4) | 38 (55.9) | 47 (73.4) | 55% |       |
| < 6 g/L                    | 47 (35.6) | 30 (44.1) | 17 (26.6) | 36% |       |

All results are n (%). † Missing data: 5 for sex, 21 for disease type, 21 for conditioning, 19 for donor type, 49 for CMV serostatus, 26 for history of GVHD, 40 for disease relapse, 19 for anti-neoplastic treatment, 1 for immunosuppressive treatments, 1 for Rituximab, 7 for lymphocytes count, 30 for T-CD4+ cell count, 53 for B-CD19+ cell count and 12 for gammaglobulinemia. Vaccine efficacy rate is the proportion of patients with a detectable antibody response. RIC for reduced intensity conditioning, MAC for myeloablative conditioning, HSCT for hematopoietic stem cell transplantation, GVHD for graft versus host disease, CMV for cytomegalovirus.



**Table S6 – Multivariate analysis of factors associated with the absence of antibody response after 2 doses of mRNA vaccine against SARS-CoV-2 in patients vaccinated within the first year from HSCT**

|                                                     | Multivariate model 1<br>n = 115 |         | Multivariate model 2<br>n = 70 |         |
|-----------------------------------------------------|---------------------------------|---------|--------------------------------|---------|
|                                                     | Odds-ratio (95%CI)              | p-value | Odds-ratio (95%CI)             | p-value |
| <b>Time since transplantation &lt; 6 months</b>     | 1.74 (0.59 to 5.1)              | 0.311   | 1.57 (0.35 to 7.07)            | 0.557   |
| <b>History of GVHD requiring systemic treatment</b> | 2.71 (1.07 to 6.87)             | 0.036   | 1.96 (0.57 to 6.7)             | 0.283   |
| <b>Rituximab (&lt; 6 months)</b>                    | 5.47 (1.39 to 21.48)            | 0.015   | 2.54 (0.42 to 15.52)           | 0.311   |
| <b>Absolute lymphocyte count &lt; 1 G/L</b>         | 3.01 (1.28 to 7.07)             | 0.011   | -                              | -       |
| <b>T-CD4+ cell count &lt; 500/mm<sup>3</sup></b>    | -                               | -       | 2.19 (0.63 to 7.64)            | 0.218   |
| <b>B-CD19+ cell count &lt; 100/mm<sup>3</sup></b>   | -                               | -       | 4.06 (1.19 to 13.88)           | 0.026   |

Multivariate model 1 is adjusted in the full sample with available lymphocyte count and gammaglobulinemia (n=115, including 56 patients with an antibody response and 59 without), while multivariate model 2 is adjusted in a subset of patients with available T-CD4+ and B-CD19+ cells count (n=70, including 35 patients with a detectable antibody response and 35 without). All variables significantly associated with antibody response in univariate analysis were included in the multivariate analysis except for the time since transplantation which was forced into the model.

## Third dose analysis

**Table S7 – Characteristics at baseline of patients included in the third dose analysis**

|                                                                                        | <b>Overall</b>         | <b>No or minimal response after dose 2 (&lt; 250 BAU/mL)</b> | <b>Good response after dose 2 (≥ 250 BAU/mL)</b> |
|----------------------------------------------------------------------------------------|------------------------|--------------------------------------------------------------|--------------------------------------------------|
|                                                                                        | n=181                  | n=116                                                        | n=65                                             |
| <b>Age (years) : median [IQR]</b>                                                      | 60.5 [49.5, 66.9]      | 61.3 [50.0, 66.4]                                            | 58.7 [49.5, 68.0]                                |
| <b>Sex (female): n (%)</b>                                                             | 71 (39.4)              | 43 (37.4)                                                    | 28 (43.1)                                        |
| <b>Disease type: n (%)</b>                                                             |                        |                                                              |                                                  |
| Myeloid malignancy                                                                     | 131 (73.2)             | 88 (77.2)                                                    | 43 (66.2)                                        |
| Lymphoid malignancy                                                                    | 41 (22.9)              | 25 (21.9)                                                    | 16 (24.6)                                        |
| Nonmalignant                                                                           | 7 (3.9)                | 1 (0.9)                                                      | 6 (9.2)                                          |
| <b>Myeloablative conditioning: n (%)</b>                                               | 44 (25.3)              | 29 (26.1)                                                    | 15 (23.8)                                        |
| <b>Donor Type: n (%)</b>                                                               |                        |                                                              |                                                  |
| Matched unrelated                                                                      | 101 (56.7)             | 64 (56.1)                                                    | 37 (57.8)                                        |
| HLA-identical sibling                                                                  | 43 (24.2)              | 28 (24.6)                                                    | 15 (23.4)                                        |
| Haplo-identical                                                                        | 34 (19.1)              | 22 (19.3)                                                    | 12 (18.8)                                        |
| <b>History of GVHD requiring systemic treatment: n (%)</b>                             | 65 (44.8)              | 41 (44.1)                                                    | 24 (46.2)                                        |
| <b>Time since transplantation (months): median [IQR]</b>                               | 18.5 [10.1, 42.6]      | 12.2 [7.7, 24.4]                                             | 37.0 [19.9, 51.2]                                |
| < 12 months                                                                            | 65 (35.9)              | 58 (50.0)                                                    | 7 (10.8)                                         |
| ≥ 12 months                                                                            | 116 (64.1)             | 58 (50.0)                                                    | 58 (89.2)                                        |
| <b>Disease relapse after HSCT: n (%)</b>                                               | 16 (11.1)              | 14 (15.4)                                                    | 2 (3.8)                                          |
| <b>Ongoing antineoplastic treatments: n (%)</b>                                        | 25 (14.2)              | 19 (16.8)                                                    | 6 (9.5)                                          |
| <b>Ongoing immunosuppressive treatments (&lt; 3 months from the first dose): n (%)</b> | 78 (43.3)              | 67 (58.3)                                                    | 11 (16.9)                                        |
| <b>Rituximab (&lt; 6 months from the first dose): n (%)</b>                            | 16 (8.9)               | 16 (13.9)                                                    | 0 (0.0)                                          |
| <b>Absolute lymphocyte count (/mm<sup>3</sup>): median [IQR]</b>                       | 1170.0 [600.0, 2200.0] | 831.0 [500.0, 1787.0]                                        | 1640.0 [1120.0, 2440.0]                          |
| <b>T-CD4+ cell count (/mm<sup>3</sup>): median [IQR]</b>                               | 303.0 [178.5, 620.0]   | 253.0 [139.5, 712.5]                                         | 379.0 [239.5, 562.0]                             |
| <b>B-CD19+ cell count (/mm<sup>3</sup>): median [IQR]</b>                              | 159.0 [60.0, 378.0]    | 86.5 [1.0, 200.0]                                            | 361.0 [230.0, 547.5]                             |
| <b>Gammaglobulinemia (g/L): median [IQR]</b>                                           | 7.2 [4.8, 9.6]         | 6.3 [4.3, 9.1]                                               | 7.6 [6.1, 10.2]                                  |
| <b>mRNA vaccines dose 1 and 2: n (%)</b>                                               |                        |                                                              |                                                  |
| BNT162b2                                                                               | 179 (98.9)             | 114 (98.3)                                                   | 65 (100.0)                                       |
| mRNA-1273                                                                              | 2 (1.1)                | 2 (1.7)                                                      | 0                                                |
| <b>mRNA vaccines dose 3: n (%)</b>                                                     |                        |                                                              |                                                  |
| BNT162b2                                                                               | 178 (98.3)             | 113 (97.4)                                                   | 65 (100.0)                                       |
| mRNA-1273                                                                              | 3 (1.7)                | 3 (2.6)                                                      | 0                                                |
| <b>Time interval between second and third vaccine dose (days): median [IQR]</b>        | 54.0 [34.0, 73.8]      | 60.0 [42.0, 75.0]                                            | 35.0 [31.0, 69.0]                                |
| <b>Time interval between third vaccine dose and serology (days): median [IQR]</b>      | 30.0 [27.0, 35.0]      | 29.0 [26.0, 35.0]                                            | 31.0 [29.0, 35.0]                                |

Characteristics of all patients in the cohort with a third dose and an available subsequent serologic testing.

**Table S8 – Univariate analysis of factors associated with the emergence of detectable serologic response after a third vaccine dose**

|                                                                                        | No detectable serologic response after dose 3 | Detectable serologic response after dose 3 | p-value* |
|----------------------------------------------------------------------------------------|-----------------------------------------------|--------------------------------------------|----------|
|                                                                                        | n=41                                          | n=29                                       |          |
| <b>Age (years): median [IQR]</b>                                                       | 61.8 [52.1, 66.4]                             | 58.0 [49.7, 66.6]                          | 0.547    |
| <b>Sex (female): n (%)</b>                                                             | 13 (32.5)                                     | 13 (44.8)                                  | 0.429    |
| <b>Disease type: n (%)</b>                                                             |                                               |                                            | 0.394    |
| Myeloid malignancy                                                                     | 34 (85.0)                                     | 22 (75.9)                                  |          |
| Lymphoid malignancy                                                                    | 6 (15.0)                                      | 6 (20.7)                                   |          |
| Nonmalignant                                                                           | 0 (0.0)                                       | 1 (3.4)                                    |          |
| <b>Myeloablative conditioning: n (%)</b>                                               | 7 (17.1)                                      | 11 (39.3)                                  | 0.074    |
| <b>Donor Type: n (%)</b>                                                               |                                               |                                            | 0.167    |
| Matched unrelated                                                                      | 26 (65.0)                                     | 15 (51.7)                                  |          |
| HLA-identical sibling                                                                  | 9 (22.5)                                      | 5 (17.2)                                   |          |
| Haplo-identical                                                                        | 5 (12.5)                                      | 9 (31.0)                                   |          |
| <b>History of GVHD requiring systemic treatment: n (%)</b>                             | 15 (48.4)                                     | 11 (40.7)                                  | 0.749    |
| <b>Time since transplantation (months): median [IQR]</b>                               |                                               |                                            | 1.0      |
| < 12 months                                                                            | 25 (51.0)                                     | 17 (58.6)                                  |          |
| ≥ 12 months                                                                            | 16 (39.0)                                     | 12 (41.4)                                  |          |
| <b>Pretransplant CMV Serostatus</b>                                                    |                                               |                                            | 0.273    |
| recipient seronegative                                                                 | 13 (43.3.0)                                   | 7 (25.9)                                   |          |
| recipient seropositive                                                                 | 17 (56.7)                                     | 20 (74.1)                                  |          |
| <b>Disease relapse after HSCT: n (%)</b>                                               | 6 (19.4)                                      | 3 (12.0)                                   | 0.705    |
| <b>Ongoing antineoplastic treatments: n (%)</b>                                        | 8 (20.0)                                      | 3 (10.3)                                   | 0.454    |
| <b>Ongoing immunosuppressive treatments (&lt; 3 months from the first dose): n (%)</b> | 28 (70.0)                                     | 18 (62.1)                                  | 0.666    |
| <b>Rituximab (&lt; 6 months from the first dose): n (%)</b>                            | 11 (26.8)                                     | 4 (13.8)                                   | 0.311    |
| <b>Absolute lymphocyte count (/mm<sup>3</sup>): median [IQR]</b>                       | 580.0 [400.0, 918.5]                          | 823.0 [500.0, 1550.0]                      | 0.048    |
| <b>T-CD4+ cell count (/mm<sup>3</sup>): median [IQR]</b>                               | 176.0 [113.5, 471.5]                          | 226.0 [132.5, 450.0]                       | 0.448    |
| <b>B-CD19+ cell count (/mm<sup>3</sup>): median [IQR]</b>                              | 0.0 [0.0, 66.7]                               | 85.0 [49.0, 156.0]                         | 0.016    |
| <b>Gammaglobulinemia (g/L): median [IQR]</b>                                           | 5.7 [3.6, 8.0]                                | 6.3 [4.3, 8.8]                             | 0.535    |
| <b>mRNA vaccines dose 1 and 2: n (%)</b>                                               |                                               |                                            | 1.0      |
| BNT162b2                                                                               | 40 (97.6)                                     | 28 (96.6)                                  |          |
| mRNA-1273                                                                              | 1 (2.4)                                       | 1 (3.4)                                    |          |
| <b>Vaccine switch for the third dose: n (%)</b>                                        | 0                                             | 2 (6.9)                                    | 0.328    |
| <b>Time interval between second and third vaccine dose (days): median [IQR]</b>        | 57.0 [47.0, 73.0]                             | 60.0 [42.0, 76.2]                          | 0.449    |
| <b>Time interval between third vaccine dose and serology (days): median [IQR]</b>      | 30.0 [22.5, 32.0]                             | 28.5 [26.8, 34.2]                          | 0.754    |

All patients with a negative serologic response after two doses are included in this table.

**Figure S1 - Anti-Spike response after 2 vaccine doses by time from allogeneic HSCT**

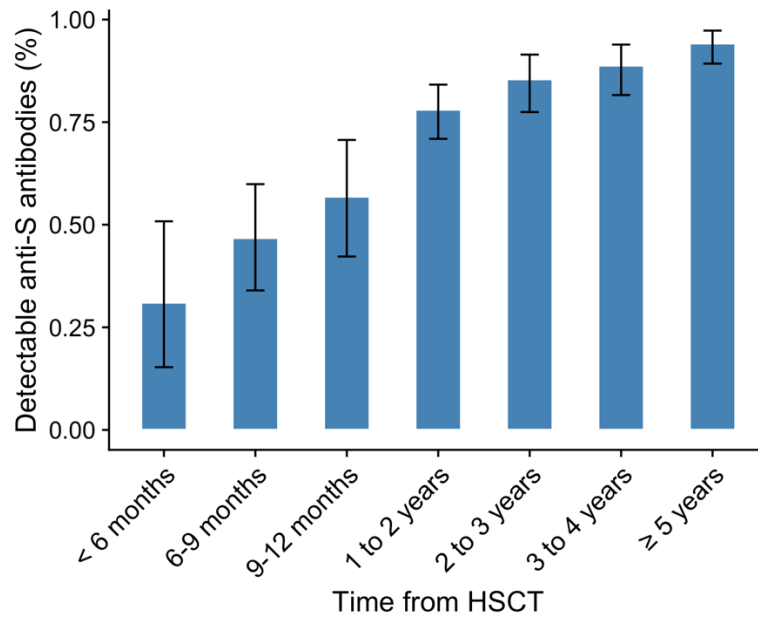

Serologic response to a two-dose vaccination according to the time from allogeneic hematopoietic stem cell transplantation (HSCT). The positivity threshold was given by the manufacturer for each used serological assay.

**Figure S2 - Anti-Spike response by number of risk-factors associated with immunization after 2 vaccine doses**

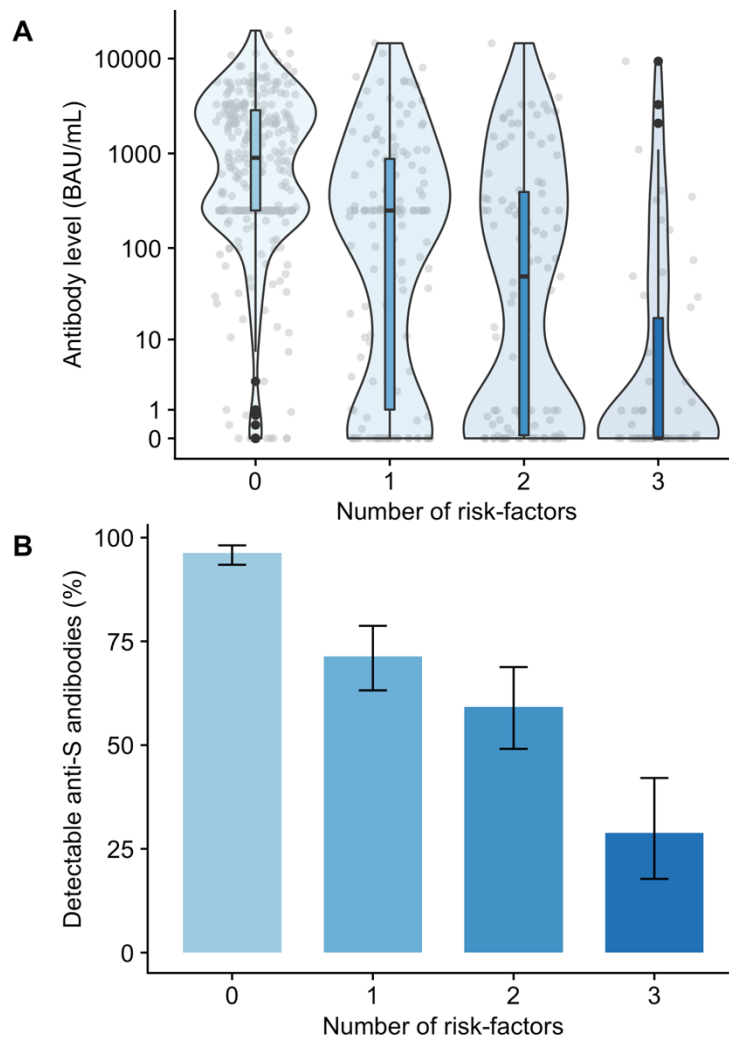

Serologic response to a two-dose vaccination according to the number of risk factors associated with immunization after dose 2 (see table 2 and figure 1). Panel A: Anti-spike antibody level. The violin plots contain interior box plots with upper and lower horizontal edges the 25<sup>th</sup> and 75<sup>th</sup> percentiles of antibody level and middle line the 50<sup>th</sup> percentile. Panel B: proportion of detectable anti-spike antibodies with 95% confidence interval. Risk-factors for absence of humoral response were significant variables in multivariate model 1: time-interval from transplantation < 12 months, absolute lymphocyte count <1G/L, systemic immunosuppressive treatments within 3 months of vaccination and use of rituximab within 6 months.

**Figure S3 – Antibody response after a third dose of SARS-CoV-2 vaccine among patients within the first year from HSCT**

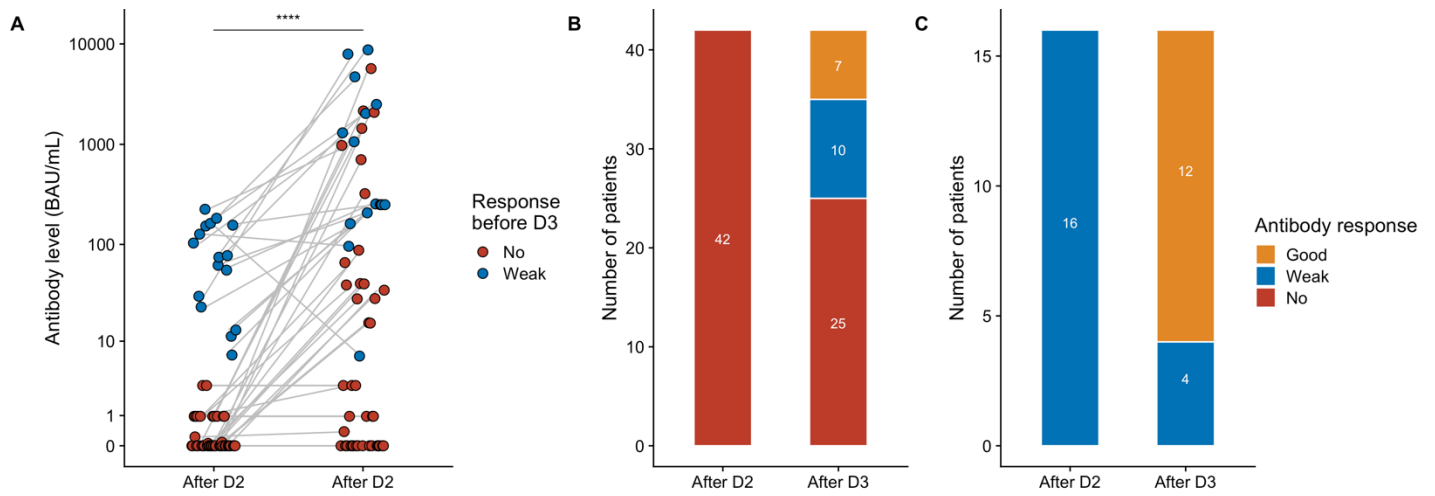

Antibody response before and after the third dose (D3) among patients vaccinated within the first year after transplantation. Panel A: antibody levels (in BAU/mL) after the second and a third dose of vaccine. Dots represent individual values and are filled according to the response after dose 2 (red for no response, blue for response < 250 BAU/mL). Antibody level significantly increased after dose 3 ( $p < 0.001$ , Mann-Whitney U test). Panel B-C: antibody qualitative response to the third dose classified according antibody levels among patients with no- (B) or weak- (V) prior detectable response. “No” for undetectable response, “Weak” for response < 250 BAU/mL and “Good” for response  $\geq 250$  BAU/mL. D2 is for the dose 2 and D3 for dose 3.
